# Supplementary material for: Populations of the Parasitic Plant Phelipanche ramosa Influence Their Seed Microbiota
Source: PubMed Central journal article supplement (PMC7379870; doi:10.3389/fpls.2020.01075), 2020-07-17
Supplement: DataSheet_1.pdf [file DataSheet_1.pdf]

# Supplemental Figures and Tables

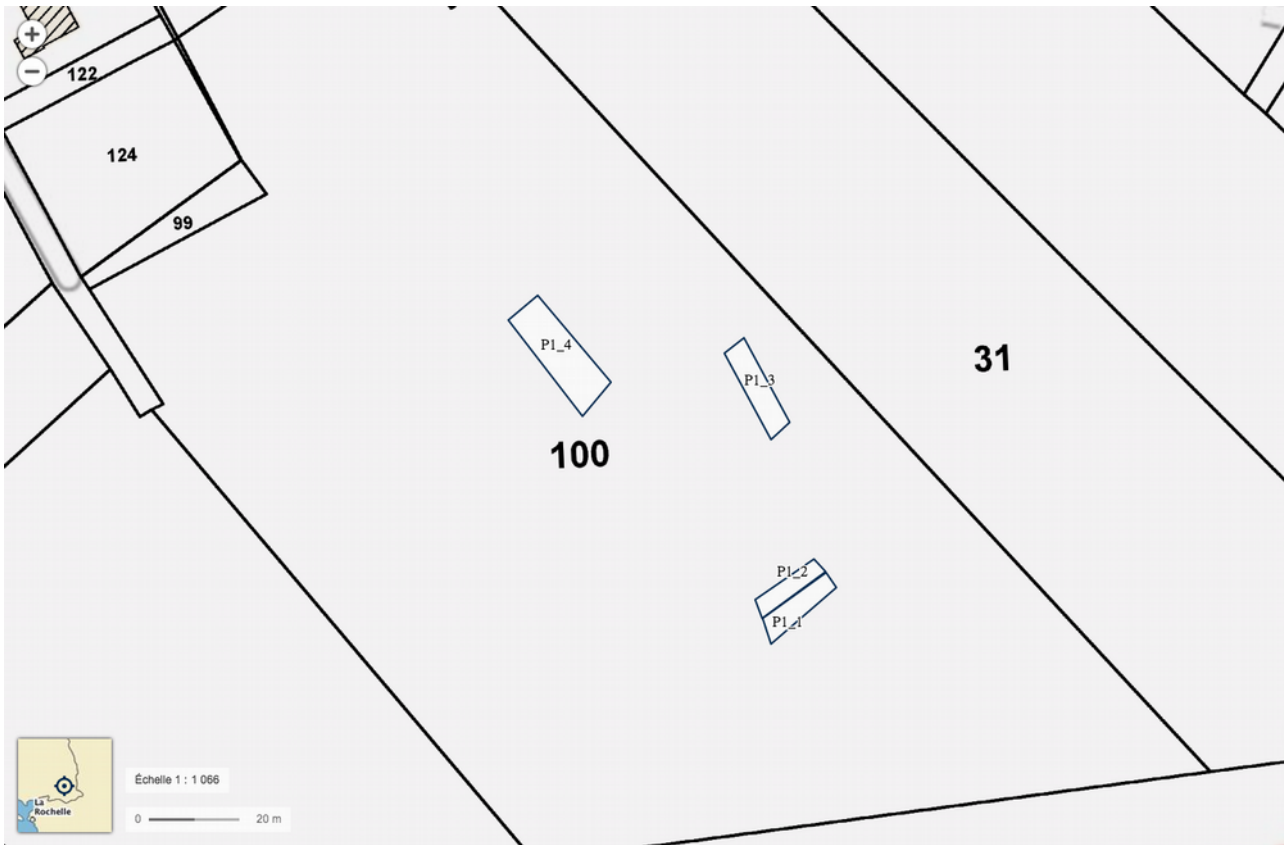

**A**

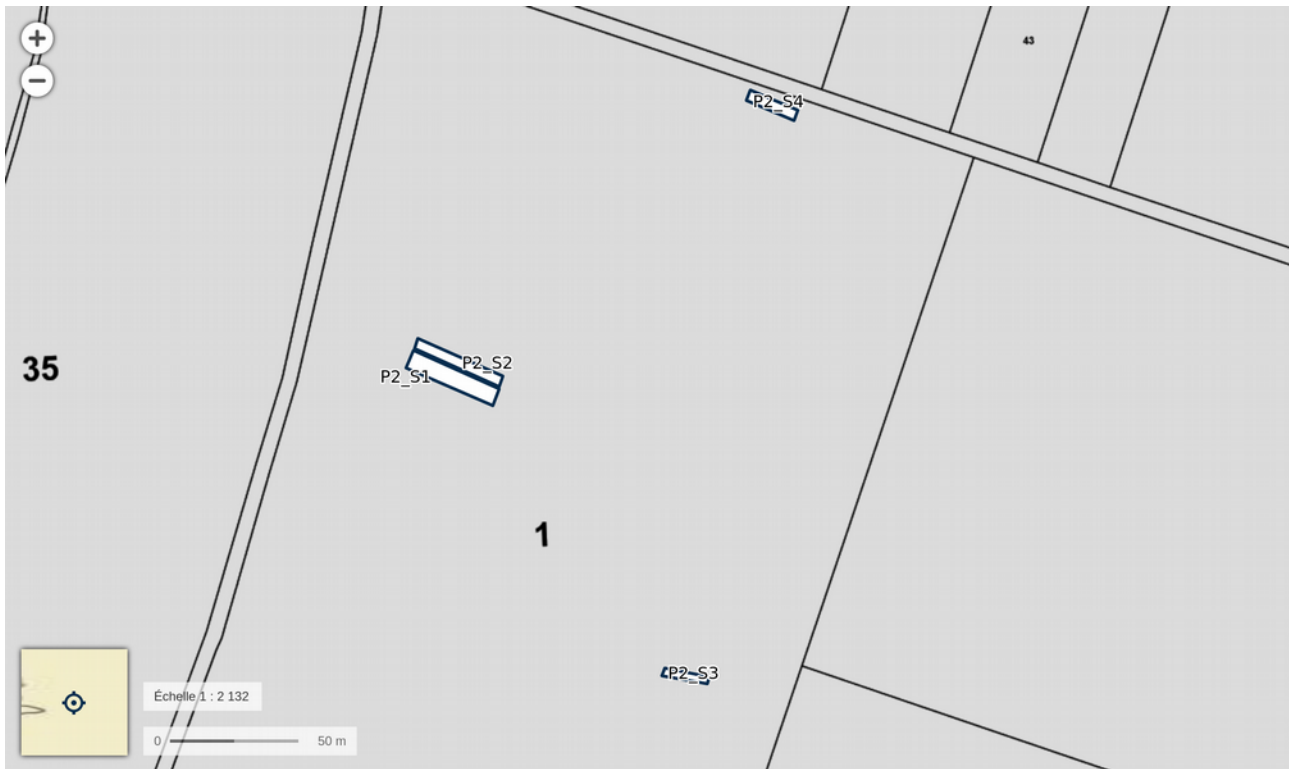

**B**

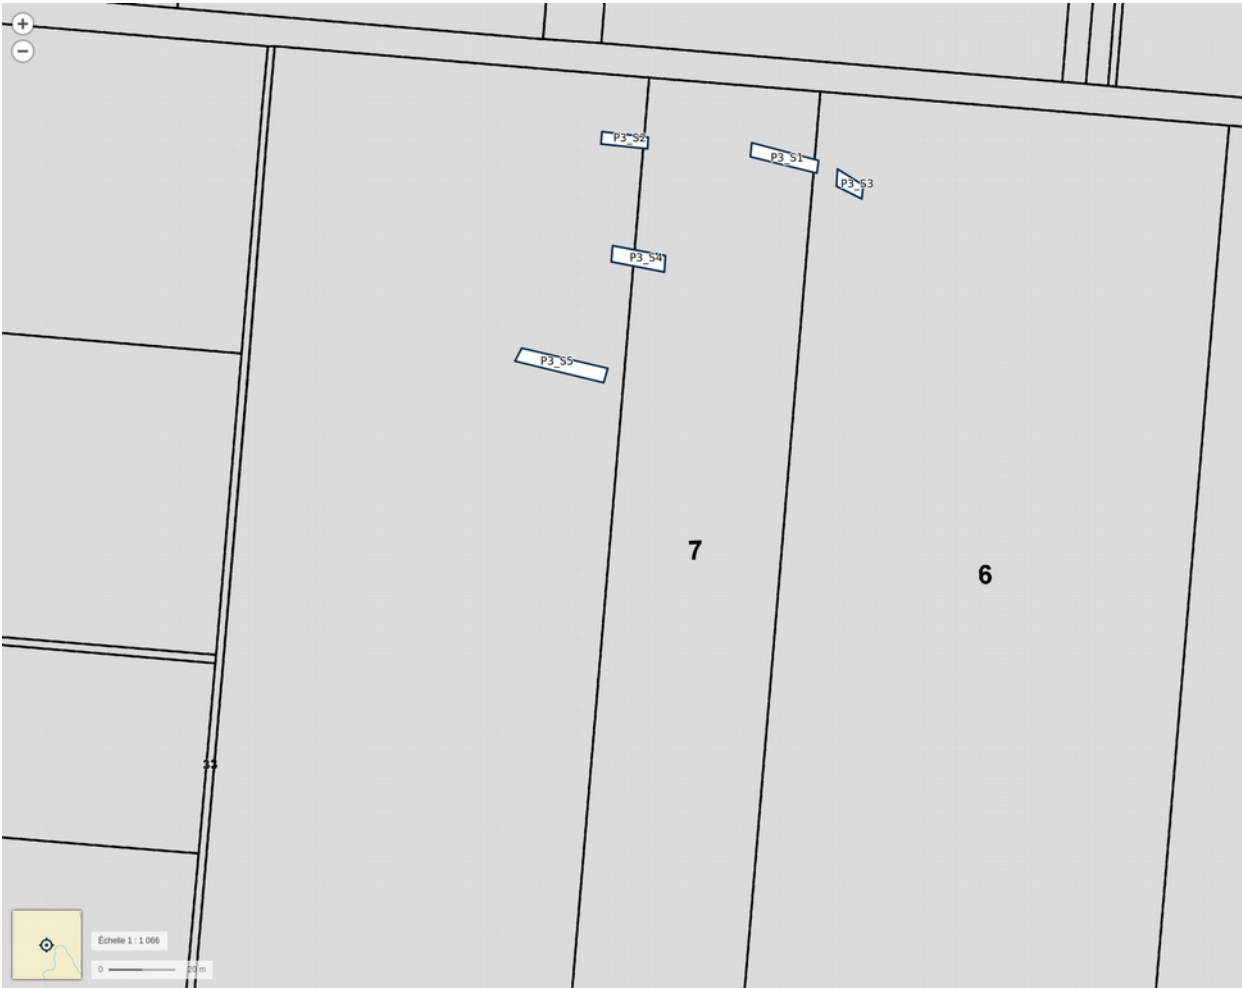

**C**

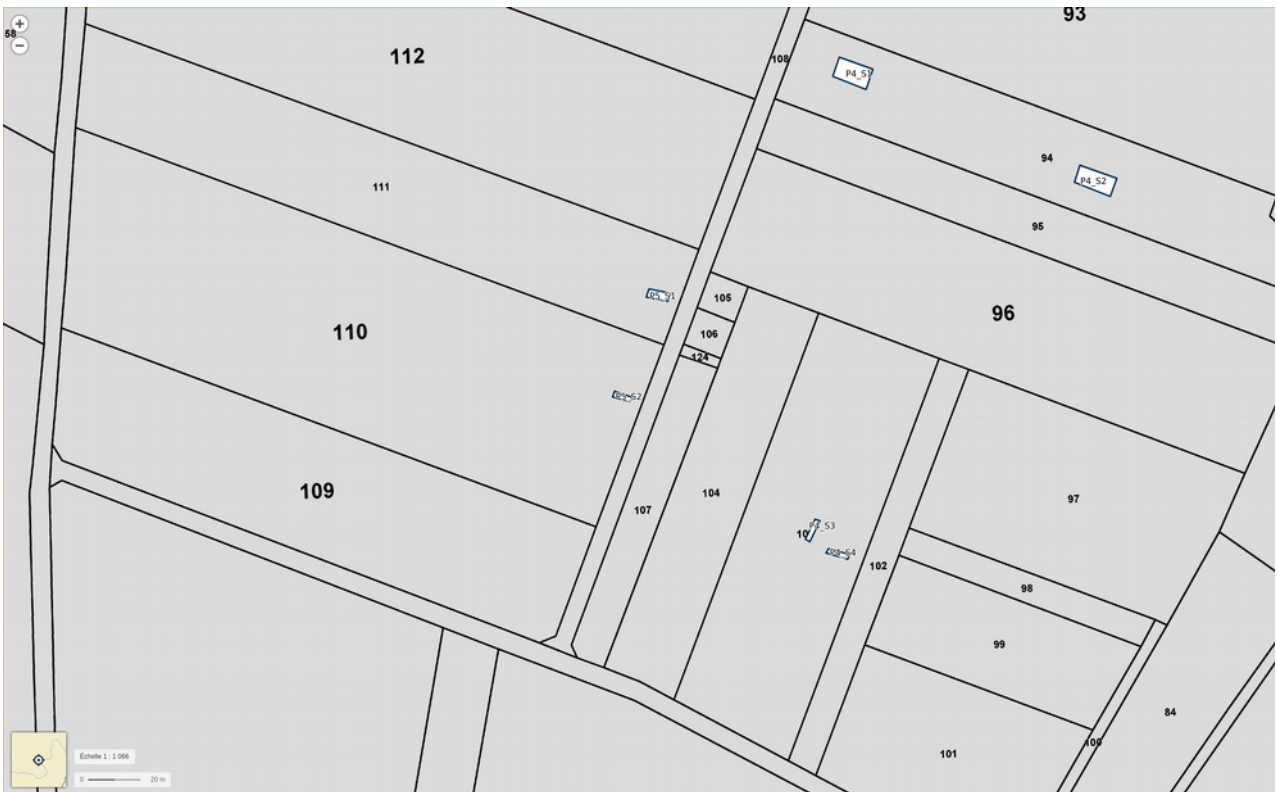

**D**

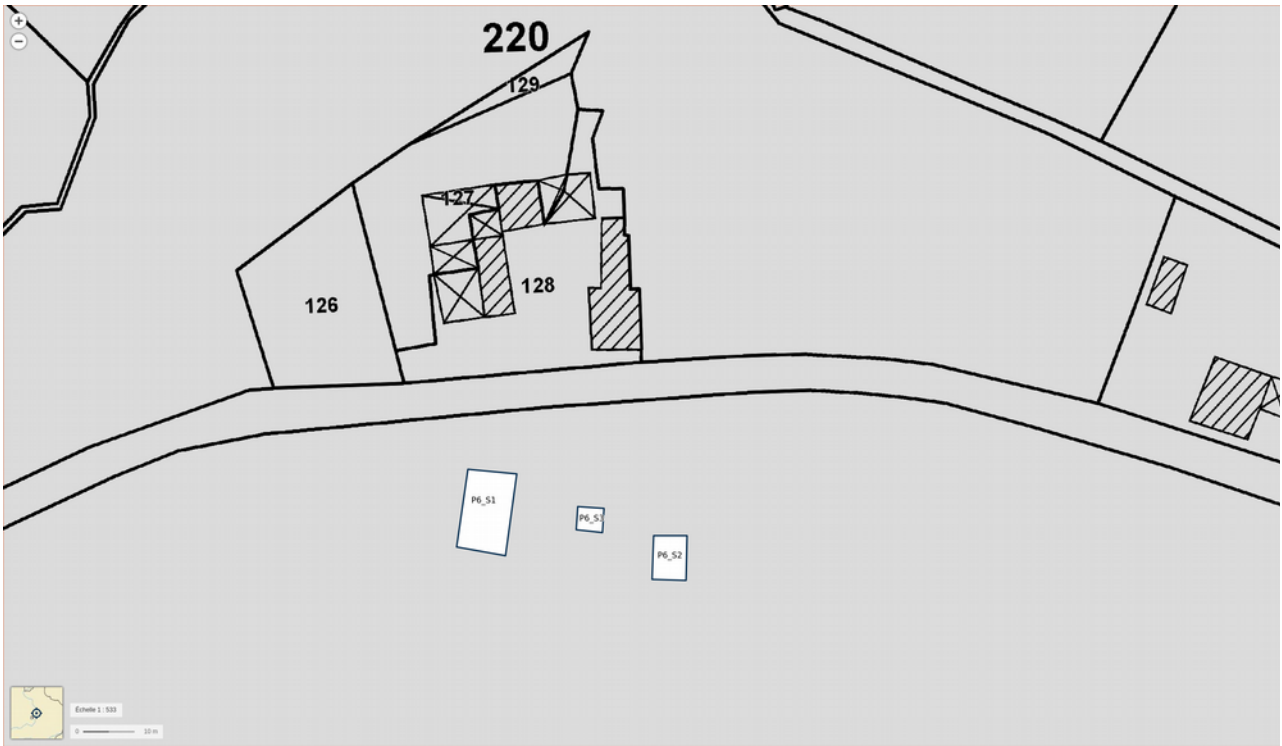

**E**

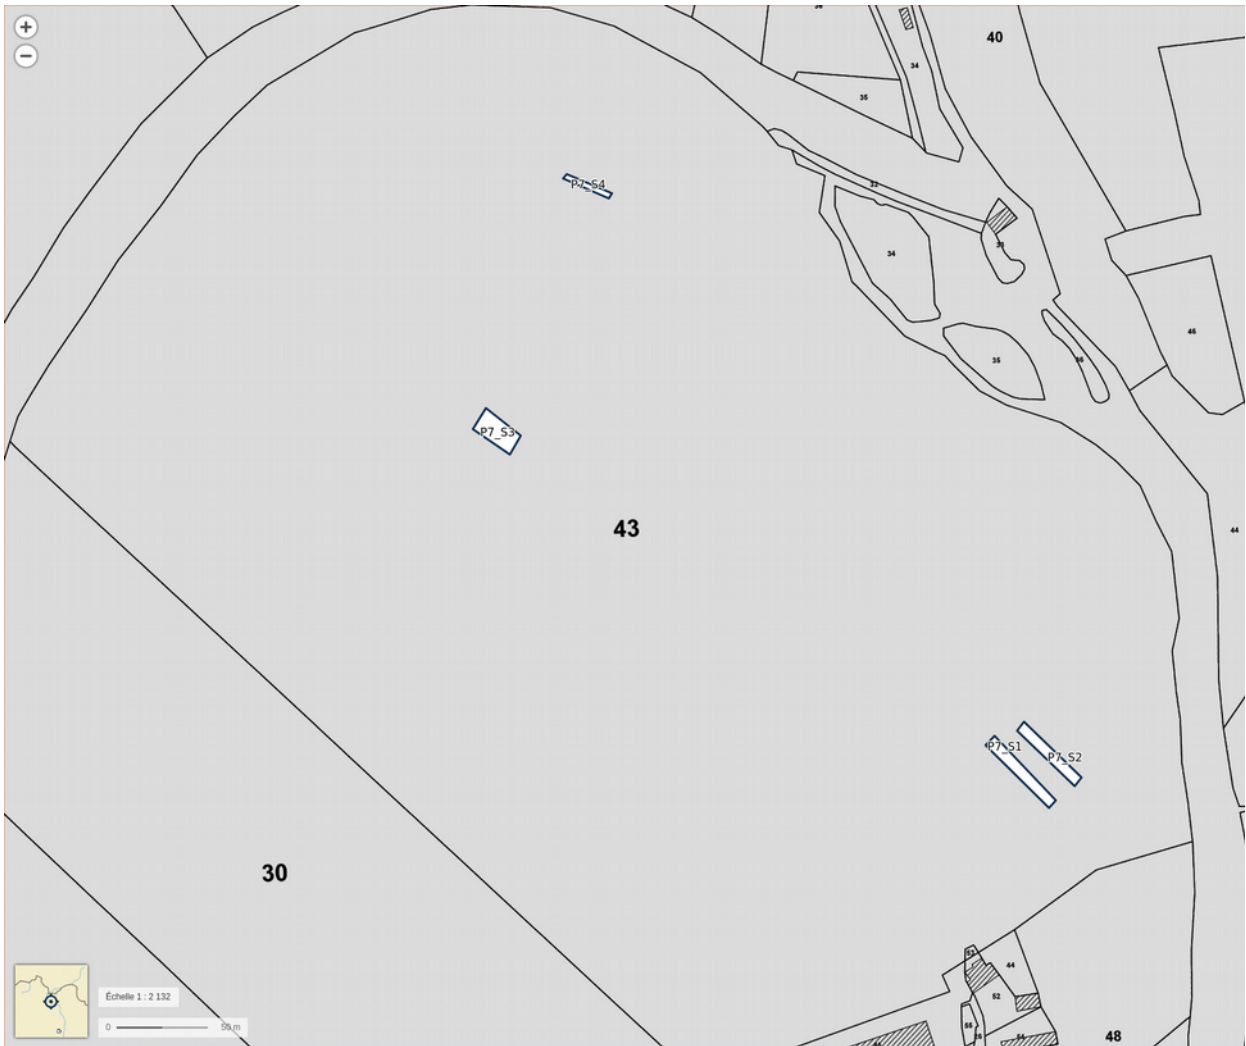

**F**

**Figure S1 Geoplots of sampled area for each sample in the different plots : A-P1, B-P2,C- P3, D-P4 & P5, E-P6 and F-P7 from Geoportail**

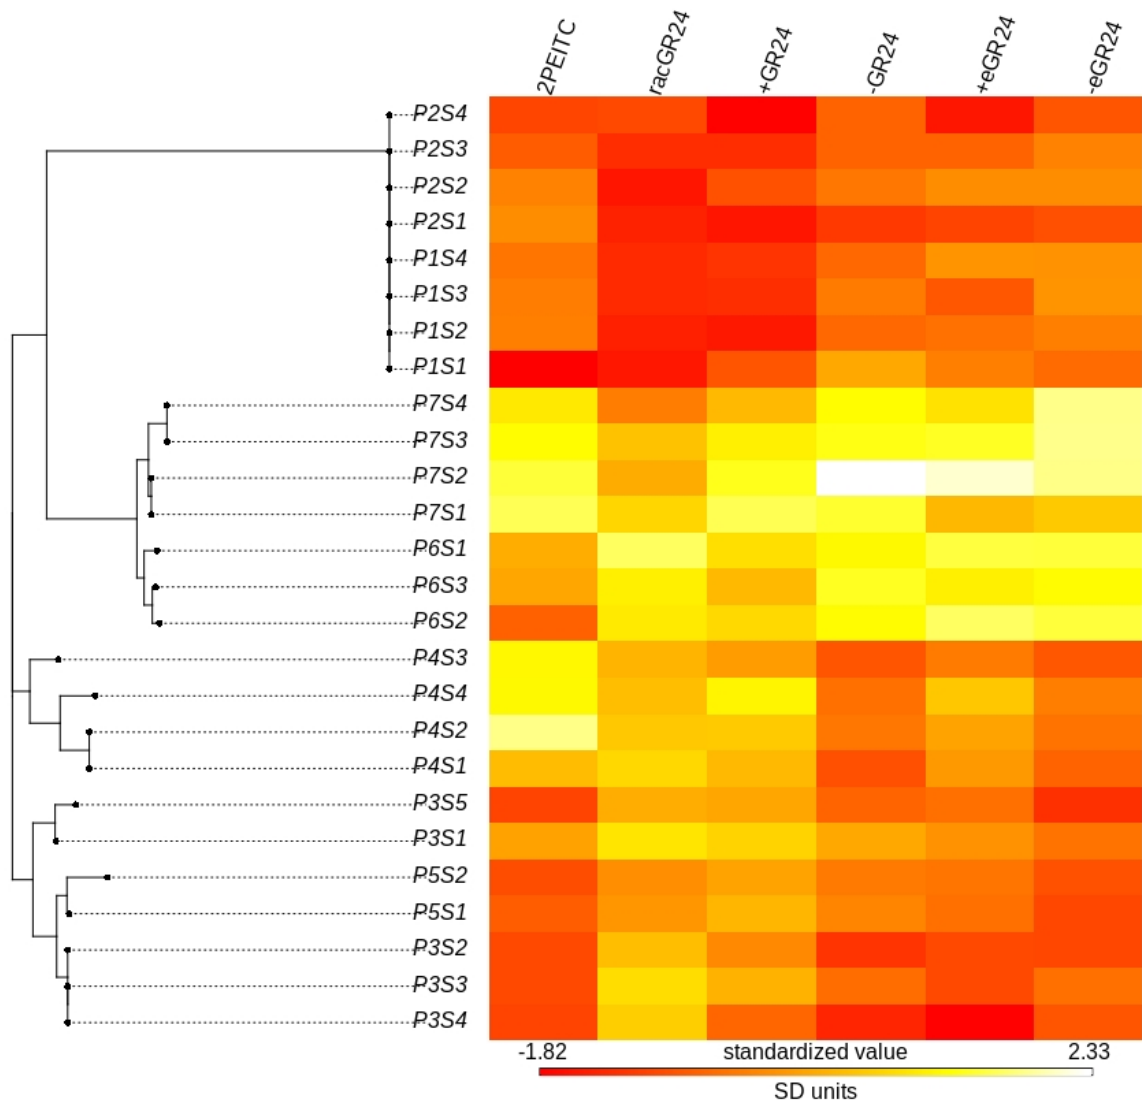

**Figure S2 Phylogenetic tree with standardized GS sensitivity heatmap from  $\log_{10}(\text{EC}_{50})$ . Legend: Red = highly GS sensitive, white = moderately GS sensitive**

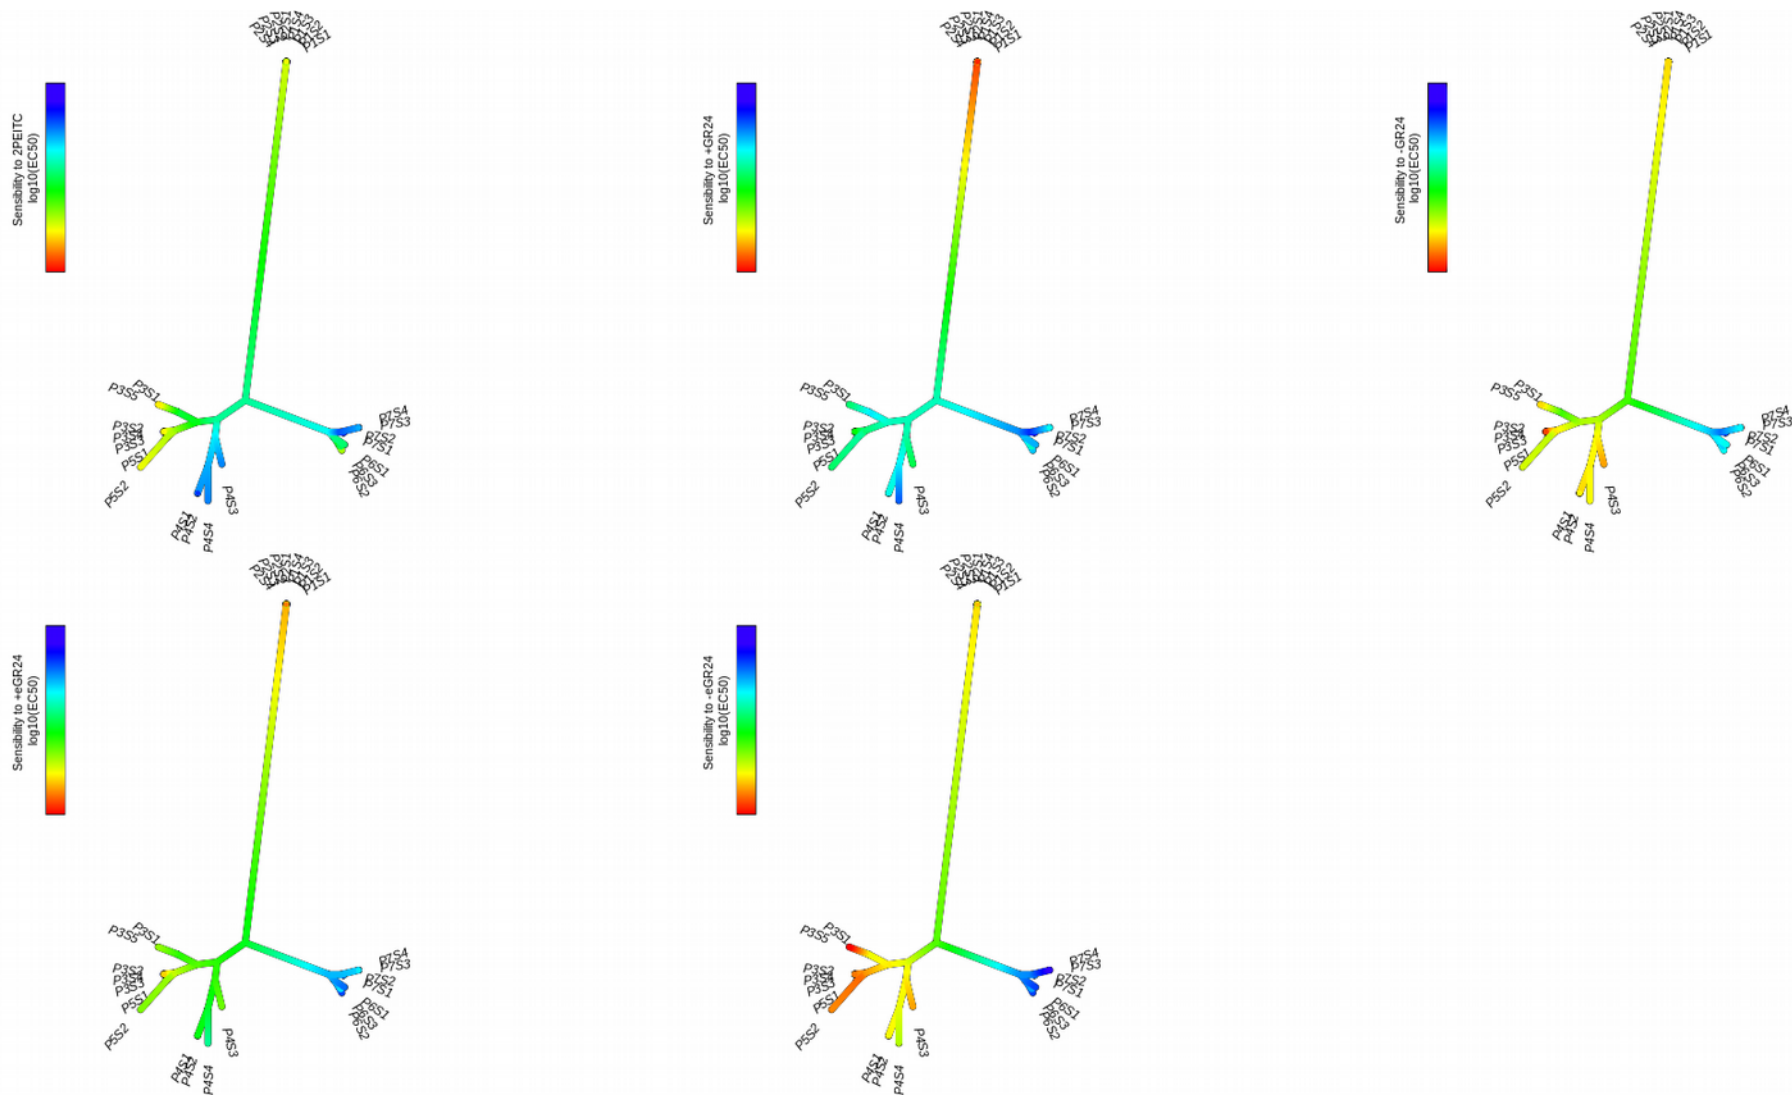

**Figure S3 Phylogenetic tree with GS sensitivity inferred from  $\log_{10}(\text{EC}_{50})$  seed sample values A. 2PEITC B. racGR24 :(-)+GR24 & (-)-GR24, C. (-)+GR24 , D. (+)-GR24, E (+)+eGR24, F. (+)-eGR24. Legend : Red = highly GS sensitive, blue = moderately GS sensitive**

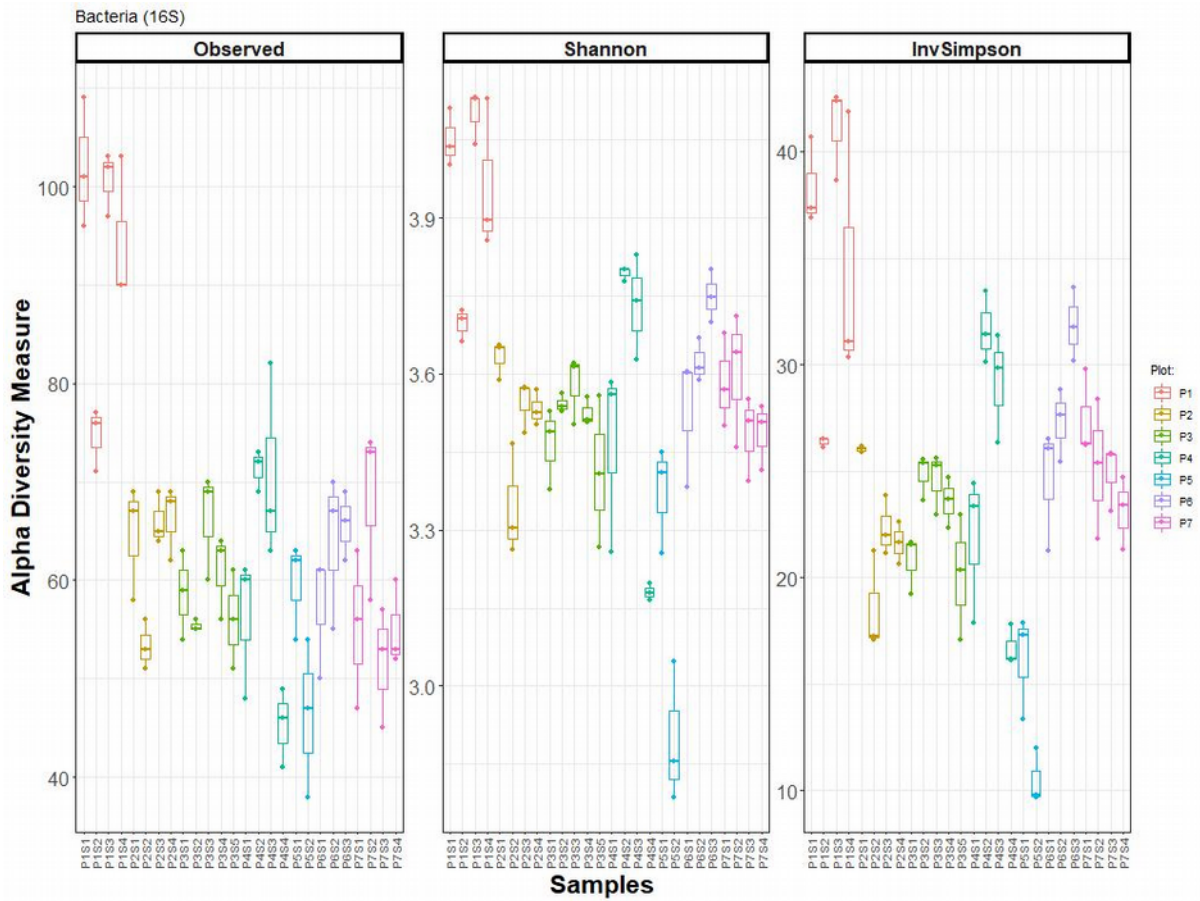

A.

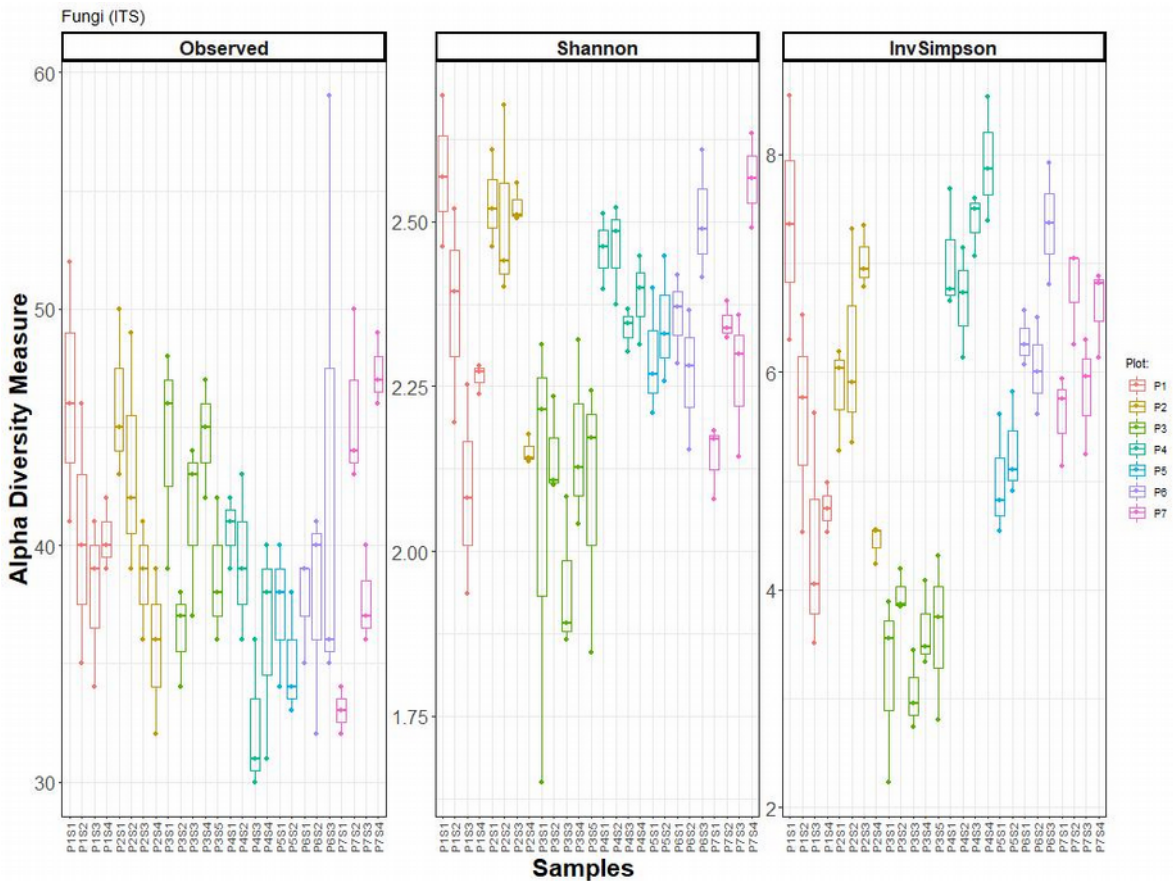

B.

Figure S4 Alpha diversity of A. bacterial and B. fungal seed communities estimated as the Observed richness, Simpson index, and Inverse Shannon index on 3 biological replicates for each sample.

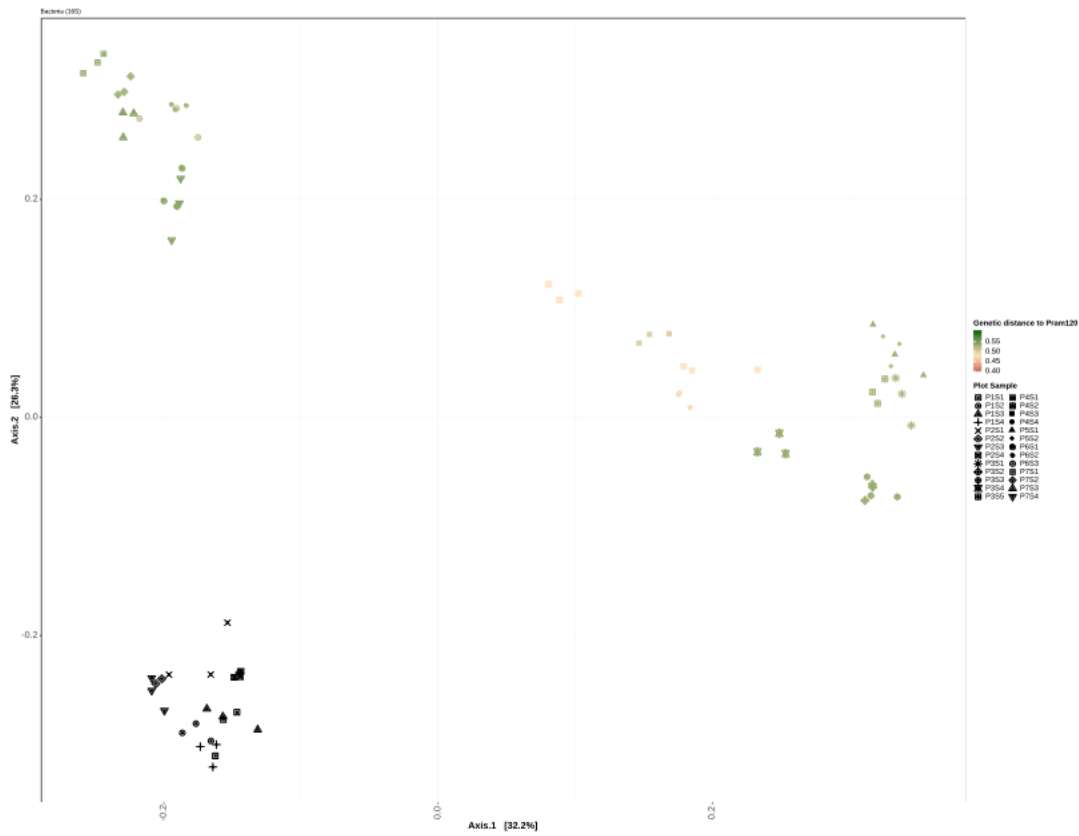

**A**

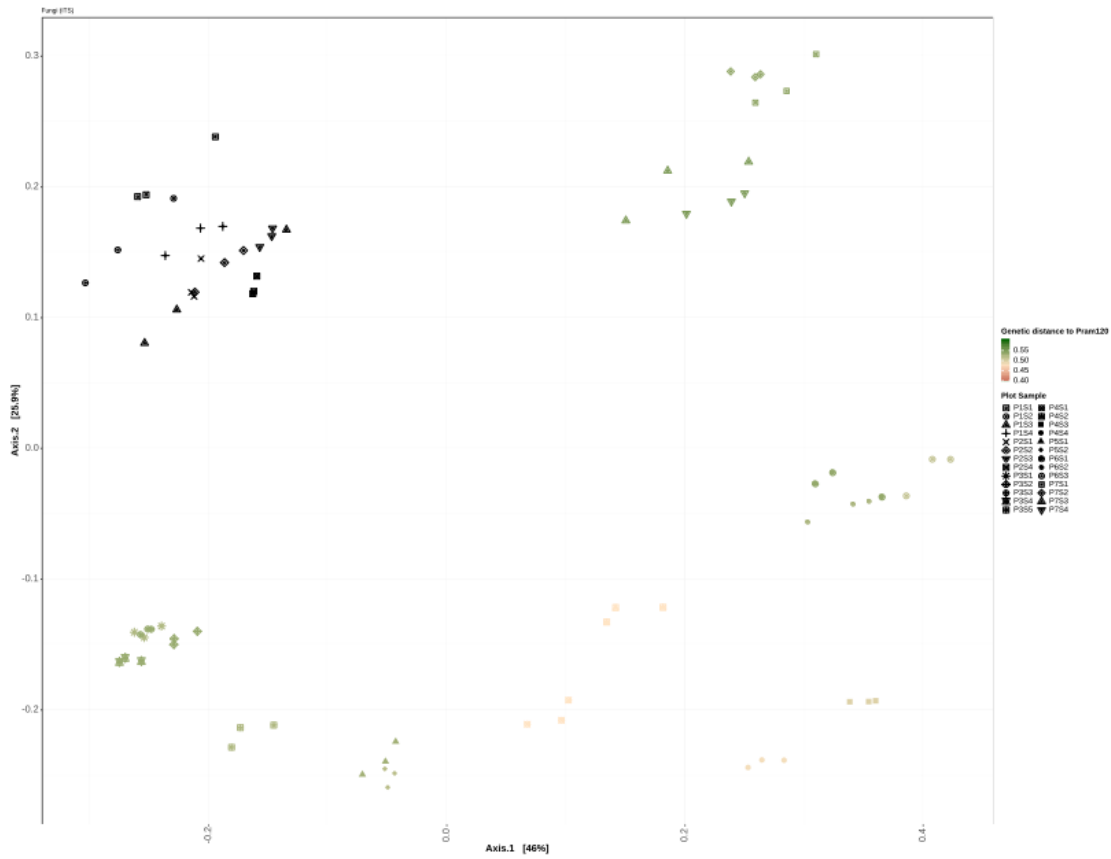

**B**

**Figure S5 PCoA of 16S seed profile (A) and ITS seed profile (B) with respect to genetic distance to oilseed rape *P. ramosa* Pram120 reference lot (as color gradient, black refers to nule genetic distance to Pram120) and plot Sample (shapes)**







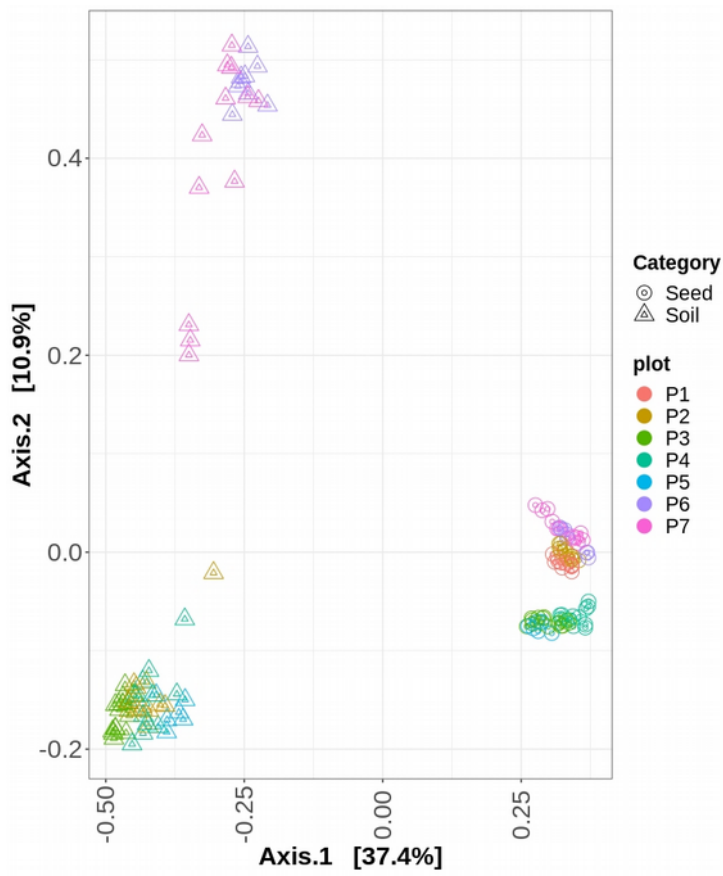

**A**

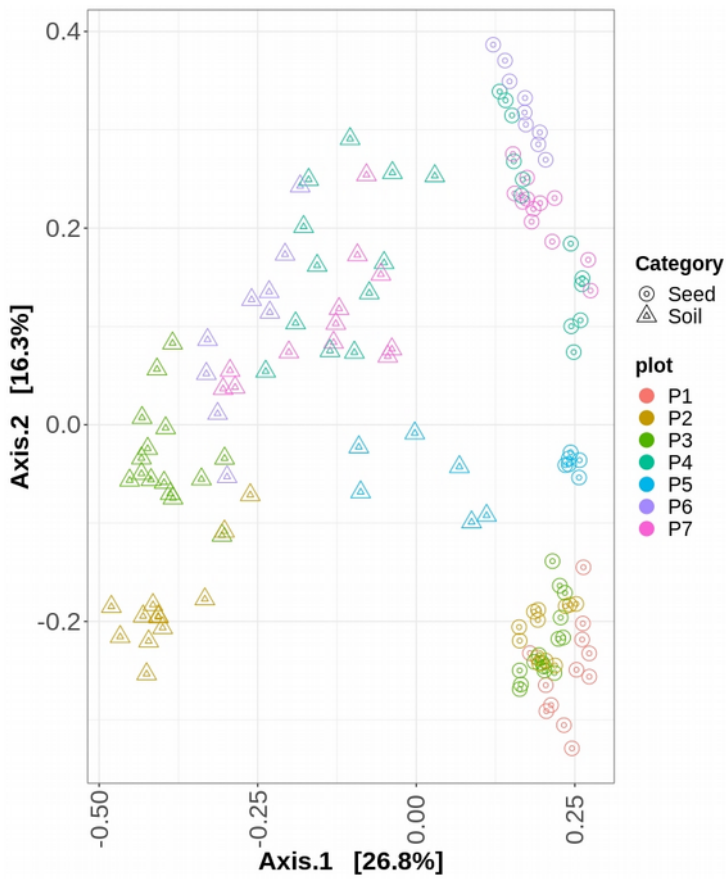

**B**

**Figure S8 PCoA analysis of seed A. 16S and B. ITS1 communities based on Bray-Curtis index on seed and soil samples according to sampling plots (in color)**

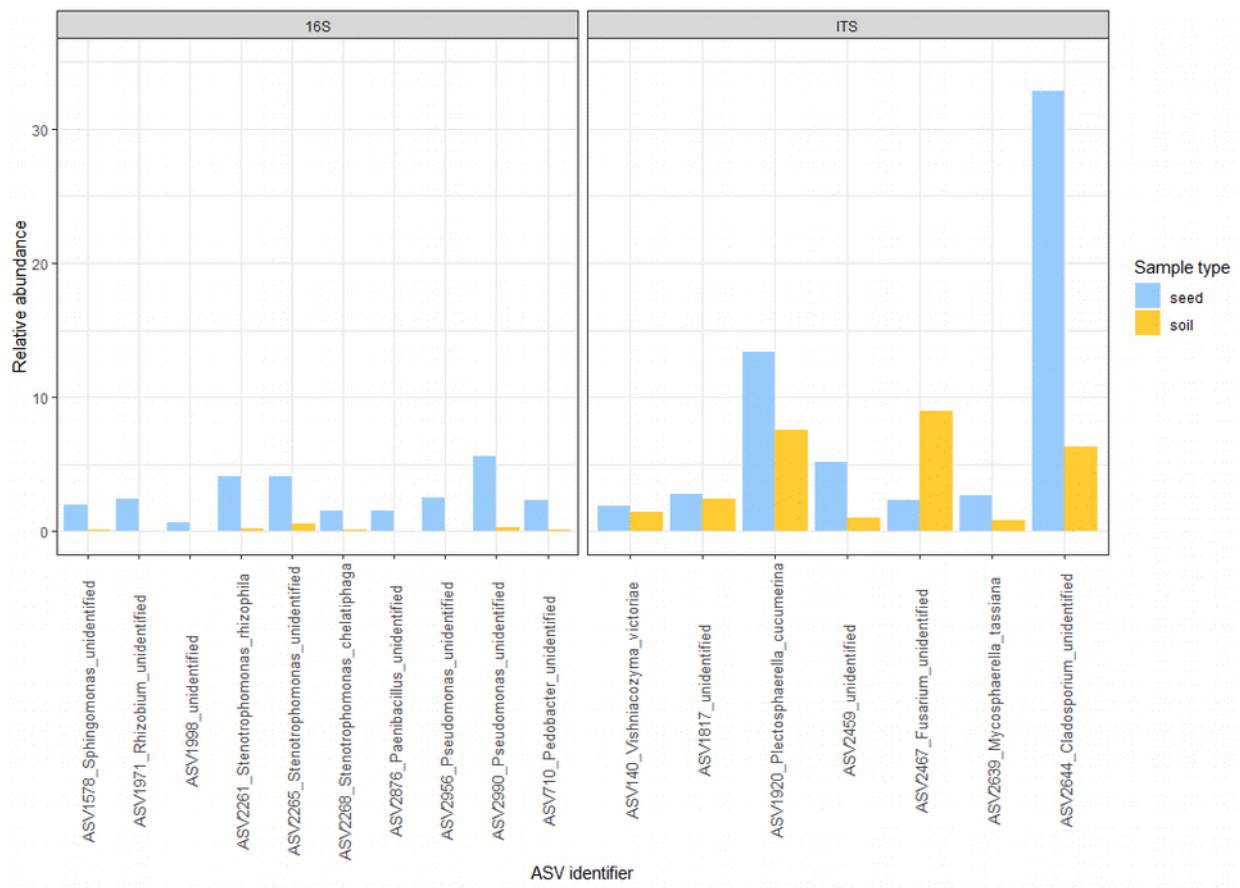

**A**

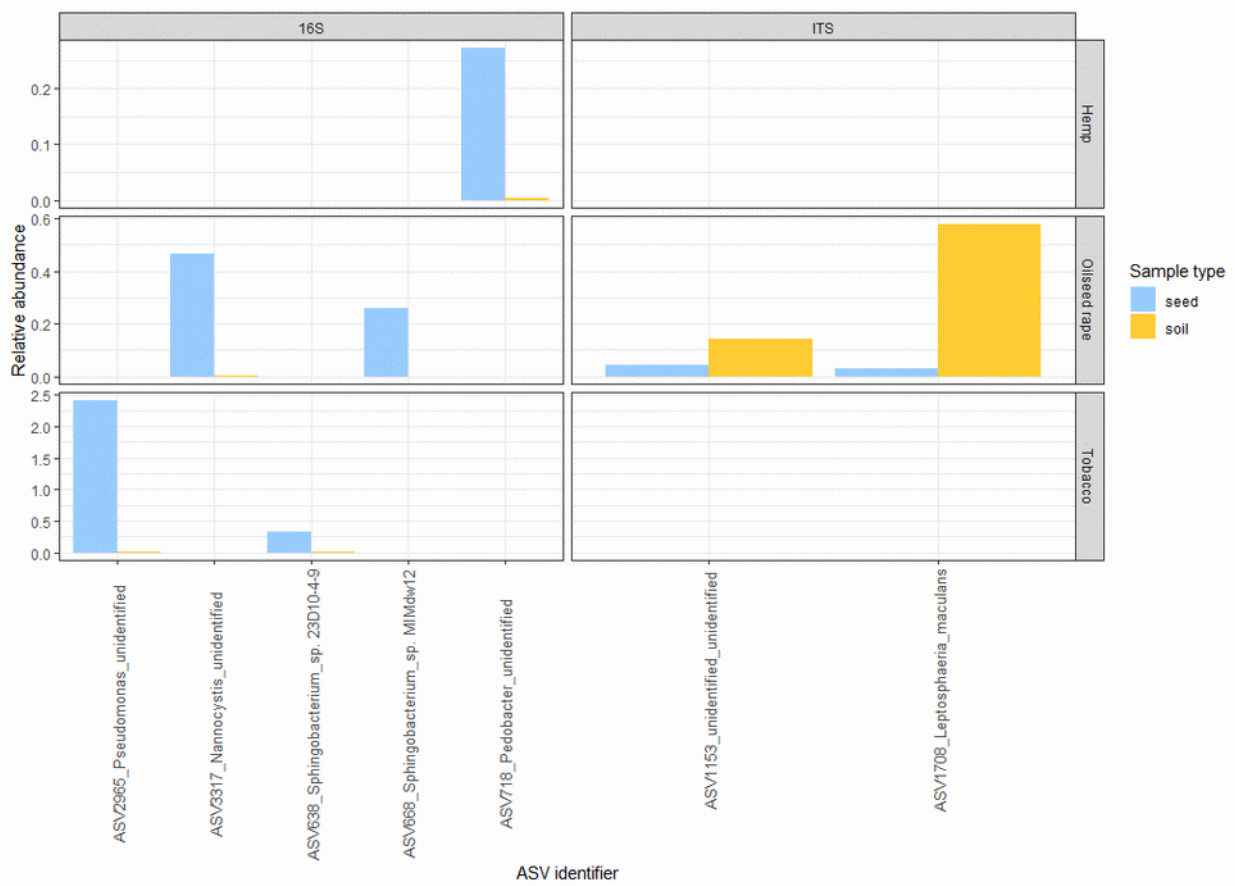

**B**

**Figure S9 Relative abundance of A. all seed core ASVs and B. host-related seed core ASVs in seeds (blue) and corresponding soils (yellow)**

**Table S1 Characteristics of samples**

| <b>Sample</b> | <b>Plot</b> | <b>2017 crop</b> | <b>Municipality</b>           | <b>Latitude</b> | <b>Longitude</b> | <b>Eco-region</b> | <b>Sampling date</b> |
|---------------|-------------|------------------|-------------------------------|-----------------|------------------|-------------------|----------------------|
| P1S1          | P1          | Oilseed rape     | Fontenay-le-compte            | 46.445115       | -0.767713        | F12               | 10/07/17             |
| P1S2          | P1          | Oilseed rape     | Fontenay-le-compte            | 46.445556       | -0.767656        | F12               | 10/07/17             |
| P1S3          | P1          | Oilseed rape     | Fontenay-le-compte            | 46.445518       | -0.767708        | F12               | 10/07/17             |
| P1S4          | P1          | Oilseed rape     | Fontenay-le-compte            | 46.445567       | -0.76825         | F12               | 10/07/17             |
| P2S1          | P2          | Oilseed rape     | Saint Ouenne                  | 46.430524       | -0.4671          | F12               | 10/07/17             |
| P2S2          | P2          | Oilseed rape     | Saint Ouenne                  | 46.430495       | -0.466671        | F12               | 10/07/17             |
| P2S3          | P2          | Oilseed rape     | Saint Ouenne                  | 46.429393       | -0.465865        | F12               | 10/07/17             |
| P2S4          | P2          | Oilseed rape     | Saint Ouenne                  | 46.431438       | -0.46541         | F12               | 10/07/17             |
| P3S1          | P3          | Tobacco          | Pliboux, le Grand Cerzé       | 46.17542        | 0.104627         | F12               | 14/09/17             |
| P3S2          | P3          | Tobacco          | Pliboux, le Grand Cerzé       | 46.175537       | 0.104187         | F11               | 14/09/17             |
| P3S3          | P3          | Tobacco          | Pliboux, le Grand Cerzé       | 46.175418       | 0.104516         | F11               | 14/09/17             |
| P3S4          | P3          | Tobacco          | Pliboux, le Grand Cerzé       | 46.175532       | 0.103621         | F11               | 14/09/17             |
| P3S5          | P3          | Tobacco          | Pliboux, le Grand Cerzé       | 46.174941       | 0.10326          | F11               | 14/09/17             |
| P4S1          | P4          | Tobacco          | Aigre, Crève Cœur             | 45.884015       | -0.00879         | F12               | 14/09/17             |
| P4S2          | P4          | Tobacco          | Aigre, Crève Cœur             | 45.884396       | -0.009975        | F12               | 14/09/17             |
| P4S3          | P4          | Tobacco          | Aigre, Crève Cœur             | 45.882836       | -0.010193        | F12               | 14/09/17             |
| P4S4          | P4          | Tobacco          | Aigre, Crève Cœur             | 45.88275        | -0.010003        | F12               | 14/09/17             |
| P5S1          | P5          | Tobacco          | Aigre, Crève Cœur             | 45.883654       | -0.01087         | F12               | 14/09/17             |
| P5S2          | P5          | Tobacco          | Aigre, Crève Cœur             | 45.883301       | -0.011136        | F12               | 14/09/17             |
| P6S1          | P6          | Hemp             | Neuville-sur-Sarthe, Beaulieu | 48.069946       | 0.213361         | B61               | 25/09/17             |
| P6S2          | P6          | Hemp             | Neuville-sur-Sarthe, Beaulieu | 48.069753       | 0.213846         | B61               | 25/09/17             |
| P6S3          | P6          | Hemp             | Neuville-sur-Sarthe, Beaulieu | 48.06985        | 0.213652         | B61               | 25/09/17             |
| P7S1          | P7          | Hemp             | Assé le boisne, Chanteloup    | 48.301193       | -0.006227        | A13               | 25/09/17             |
| P7S2          | P7          | Hemp             | Assé le boisne, Chanteloup    | 48.301217       | -0.00614         | A13               | 25/09/17             |
| P7S3          | P7          | Hemp             | Assé le boisne, Chanteloup    | 48.304185       | -0.009447        | A13               | 25/09/17             |
| P7S4          | P7          | Hemp             | Assé le boisne, Chanteloup    | 48.304277       | -0.009784        | A13               | 25/09/17             |

**Table S2 Ten year-history of crop rotation in sampled fields based on Geoportail graphical plot register: crop areas declared by farmers from 2007-2017.**

| <b>Year</b> | <b>P1</b>          | <b>P2</b>   | <b>P3</b>      | <b>P4</b>      | <b>P5</b>      | <b>P6</b>   | <b>P7</b>         |
|-------------|--------------------|-------------|----------------|----------------|----------------|-------------|-------------------|
| <b>2017</b> | <b>WOSR</b>        | <b>WOSR</b> | <b>Tobacco</b> | <b>Tobacco</b> | <b>Tobacco</b> | <b>Hemp</b> | <b>Hemp</b>       |
| <b>2016</b> | Winter soft wheat  | Sunflower   | <b>Tobacco</b> | <b>Tobacco</b> | <b>Tobacco</b> | <b>Hemp</b> | Winter Barley     |
| <b>2015</b> | Winter Durum wheat | WOSR        | <b>Tobacco</b> | <b>Tobacco</b> | <b>Tobacco</b> | <b>Hemp</b> | Winter soft wheat |
| <b>2014</b> | <b>WOSR</b>        | Soft wheat  | Sunflower      | Sunflower      | Maize          | Barley      | Winter soft wheat |
| <b>2013</b> | Durum wheat        | Sunflower   | Soft wheat     | Maize          | Maize          | Maize       | Maize             |
| <b>2012</b> | Other oleaginous   | Sunflower   | Maize          | Maize          | Maize          | Cereals     | Barley            |
| <b>2011</b> | Soft wheat         | Soft wheat  | Soft wheat     | Maize          | Tobacco        | Cereals     | Winter soft wheat |
| <b>2010</b> | <b>WOSR</b>        | <b>WOSR</b> | Sunflower      | Maize          | Sunflower      | Maize       | Protein crops     |
| <b>2009</b> | Winter Barley      | Sunflower   | Soft wheat     | Maize          | Maize          | Cereals     | Protein crops     |
| <b>2008</b> | Sunflower          | Soft wheat  | Sunflower      | Maize          | Cereals        | Cereals     | Meadow            |
| <b>2007</b> | Soft wheat         | <b>WOSR</b> | Soft wheat     | Maize          | Maize          | Maize       | Winter soft wheat |

**Table S3 Amplicon sizes of the twenty SSR markers on the 26 seed samples**

| Sample  | PR-ccTri01 |     | PR-nDi17 |     | Phera19 |     | Phera28 |     | Phera38 |     | PR-nDi02 |     | PR-cDi01 |     | Phera10 |     | PR-nTri02 |     | PR-cTri11 |     | Phera02 |     | PR-nTri08 |     | PR-cTri03 |     | PR-cDi09 |     | Phera40 |     | PR-nDi01 |     | PR-cDi05 |     | Phera18 |     | Phera20 |     | Phera46 |     |
|---------|------------|-----|----------|-----|---------|-----|---------|-----|---------|-----|----------|-----|----------|-----|---------|-----|-----------|-----|-----------|-----|---------|-----|-----------|-----|-----------|-----|----------|-----|---------|-----|----------|-----|----------|-----|---------|-----|---------|-----|---------|-----|
| P1S1    | 125        | 125 | 143      | 143 | 162     | 162 | 216     | 216 | 278     | 278 | 179      | 179 | 217      | 217 | 136     | 136 | 265       | 265 | 218       | 218 | 136     | 136 | 255       | 255 | 119       | 119 | 153      | 162 | 189     | 189 | 200      | 200 | 224      | 224 | 150     | 150 | 177     | 177 | 277     | 277 |
| P1S2    | 125        | 125 | 143      | 143 | 162     | 162 | 216     | 216 | 278     | 278 | 179      | 179 | 217      | 217 | 136     | 136 | 265       | 265 | 218       | 218 | 136     | 136 | 255       | 255 | 119       | 119 | 153      | 162 | 189     | 189 | 200      | 200 | 224      | 224 | 150     | 150 | 177     | 177 | 277     | 277 |
| P1S3    | 125        | 125 | 143      | 143 | 162     | 162 | 216     | 216 | 278     | 278 | 179      | 179 | 217      | 217 | 136     | 136 | 265       | 265 | 218       | 218 | 136     | 136 | 255       | 255 | 119       | 119 | 153      | 162 | 189     | 189 | 200      | 200 | 224      | 224 | 150     | 150 | 176     | 176 | 277     | 277 |
| P1S4    | 125        | 125 | 143      | 143 | 162     | 162 | 216     | 216 | 278     | 278 | 179      | 179 | 217      | 217 | 136     | 136 | 265       | 265 | 218       | 218 | 136     | 136 | 255       | 255 | 119       | 119 | 153      | 162 | 189     | 189 | 200      | 200 | 224      | 224 | 150     | 150 | 177     | 177 | 277     | 277 |
| P2S1    | 125        | 125 | 143      | 143 | 162     | 162 | 216     | 216 | 278     | 278 | 179      | 179 | 217      | 217 | 136     | 136 | 265       | 265 | 218       | 218 | 135     | 135 | 255       | 255 | 119       | 119 | 153      | 162 | 188     | 188 | 200      | 200 | 224      | 224 | 150     | 150 | 177     | 177 | 277     | 277 |
| P2S2    | 125        | 125 | 143      | 143 | 162     | 162 | 216     | 216 | 278     | 278 | 179      | 179 | 217      | 217 | 136     | 136 | 265       | 265 | 218       | 218 | 136     | 136 | 255       | 255 | 119       | 119 | 153      | 162 | 189     | 189 | 200      | 200 | 224      | 224 | 150     | 150 | 177     | 177 | 277     | 277 |
| P2S3    | 125        | 125 | 143      | 143 | 162     | 162 | 216     | 216 | 278     | 278 | 179      | 179 | 217      | 217 | 136     | 136 | 265       | 265 | 218       | 218 | 136     | 136 | 255       | 255 | 119       | 119 | 153      | 162 | 189     | 189 | 200      | 200 | 224      | 224 | 150     | 150 | 177     | 177 | 277     | 277 |
| P2S4    | 125        | 125 | 143      | 143 | 162     | 162 | 216     | 216 | 278     | 278 | 179      | 179 | 217      | 217 | 136     | 136 | 265       | 265 | 218       | 218 | 136     | 136 | 255       | 255 | 119       | 119 | 153      | 162 | 189     | 189 | 200      | 200 | 224      | 224 | 150     | 150 | 177     | 177 | 277     | 277 |
| P3S1    | 122        | 122 | 143      | 143 | 159     | 159 | 214     | 214 | 260     | 260 | 189      | 189 | 221      | 221 | 157     | 157 | 295       | 298 | 221       | 221 | 150     | 150 | 284       | 258 | 121       | 121 | 149      | 149 | 188     | 188 | 197      | 197 | 224      | 224 | 140     | 140 | 152     | 152 | 254     | 254 |
| P3S2    | 122        | 122 | 143      | 143 | 159     | 159 | 214     | 214 | 260     | 260 | 189      | 189 | 221      | 221 | 157     | 157 | 295       | 298 | 221       | 221 | 150     | 150 | 281       | 255 | 121       | 121 | 149      | 149 | 186     | 186 | 197      | 197 | 224      | 224 | 140     | 140 | 152     | 152 | 254     | 254 |
| P3S3    | 122        | 122 | 143      | 143 | 159     | 159 | 214     | 214 | 260     | 260 | 189      | 189 | 221      | 221 | 157     | 157 | 295       | 298 | 221       | 221 | 150     | 150 | 281       | 255 | 121       | 121 | 149      | 149 | 186     | 186 | 197      | 197 | 224      | 224 | 140     | 140 | 152     | 152 | 254     | 254 |
| P3S4    | 122        | 122 | 143      | 143 | 159     | 159 | 214     | 214 | 260     | 260 | 189      | 189 | 221      | 221 | 157     | 157 | 295       | 298 | 221       | 221 | 150     | 150 | 281       | 255 | 121       | 121 | 149      | 149 | 186     | 186 | 197      | 197 | 224      | 224 | 140     | 140 | 152     | 152 | 254     | 254 |
| P3S5    | 122        | 122 | 143      | 143 | 159     | 159 | 214     | 214 | 260     | 260 | 189      | 189 | 221      | 221 | 157     | 157 | 295       | 298 | 222       | 222 | 150     | 150 | 284       | 258 | 121       | 121 | 149      | 149 | 188     | 188 | 197      | 197 | 224      | 224 | 140     | 140 | 150     | 150 | 254     | 254 |
| P4S1    | 122        | 122 | 143      | 143 | 159     | 159 | 214     | 214 | 260     | 260 | 179      | 179 | 221      | 221 | 146     | 146 | 271       | 271 | 221       | 222 | 152     | 152 | 284       | 258 | 121       | 121 | 149      | 149 | 188     | 188 | 197      | 197 | 224      | 224 | 140     | 140 | 152     | 152 | 254     | 254 |
| P4S2    | 122        | 122 | 143      | 143 | 159     | 159 | 214     | 214 | 260     | 260 | 179      | 179 | 221      | 221 | 146     | 146 | 271       | 271 | 221       | 221 | 152     | 152 | 284       | 258 | 121       | 121 | 149      | 149 | 188     | 188 | 197      | 197 | 224      | 224 | 140     | 140 | 152     | 152 | 254     | 254 |
| P4S3    | 122        | 122 | 143      | 143 | 159     | 159 | 214     | 214 | 262     | 262 | 179      | 179 | 221      | 221 | 154     | 154 | 298       | 298 | 221       | 221 | 150     | 150 | 284       | 258 | 121       | 121 | 149      | 149 | 188     | 188 | 197      | 197 | 224      | 224 | 140     | 140 | 152     | 152 | 254     | 254 |
| P4S4    | 122        | 122 | 143      | 143 | 159     | 159 | 214     | 214 | 262     | 262 | 179      | 179 | 221      | 221 | 154     | 154 | 271       | 271 | 221       | 221 | 154     | 154 | 284       | 258 | 121       | 121 | 149      | 149 | 188     | 188 | 197      | 197 | 224      | 224 | 140     | 140 | 153     | 153 | 254     | 254 |
| P5S1    | 122        | 122 | 143      | 143 | 159     | 159 | 214     | 214 | 260     | 260 | 189      | 189 | 221      | 221 | 154     | 154 | 271       | 298 | 221       | 221 | 150     | 150 | 281       | 255 | 121       | 121 | 149      | 149 | 186     | 186 | 197      | 197 | 224      | 224 | 140     | 140 | 152     | 152 | 254     | 254 |
| P5S2    | 122        | 122 | 143      | 143 | 159     | 159 | 214     | 214 | 260     | 260 | 189      | 189 | 221      | 221 | 146     | 146 | 271       | 271 | 221       | 221 | 150     | 150 | 281       | 255 | 121       | 121 | 149      | 149 | 186     | 186 | 197      | 197 | 224      | 224 | 140     | 140 | 152     | 152 | 254     | 254 |
| P6S1    | 122        | 122 | 143      | 143 | 162     | 162 | 214     | 214 | 266     | 266 | 189      | 189 | 221      | 221 | 161     | 161 | 283       | 283 | 221       | 221 | 156     | 156 | 279       | 255 | 121       | 121 | 149      | 149 | 186     | 186 | 197      | 197 | 226      | 226 | 140     | 140 | 152     | 152 | 254     | 254 |
| P6S2    | 122        | 122 | 143      | 143 | 162     | 162 | 214     | 214 | 266     | 266 | 189      | 189 | 221      | 221 | 161     | 161 | 283       | 283 | 221       | 221 | 156     | 156 | 281       | 258 | 121       | 121 | 149      | 149 | 188     | 188 | 197      | 197 | 226      | 226 | 140     | 140 | 152     | 152 | 254     | 254 |
| P6S3    | 122        | 122 | 143      | 143 | 162     | 162 | 214     | 214 | 266     | 266 | 189      | 189 | 221      | 221 | 161     | 161 | 283       | 283 | 221       | 221 | 156     | 156 | 279       | 255 | 121       | 121 | 149      | 149 | 188     | 188 | 197      | 197 | 226      | 226 | 140     | 140 | 152     | 152 | 254     | 254 |
| P7S1    | 122        | 122 | 143      | 143 | 162     | 162 | 214     | 214 | 266     | 266 | 189      | 189 | 221      | 221 | 161     | 161 | 283       | 283 | 221       | 221 | 154     | 154 | 279       | 255 | 121       | 121 | 149      | 149 | 186     | 186 | 197      | 197 | 226      | 226 | 140     | 140 | 152     | 152 | 254     | 254 |
| P7S2    | 122        | 122 | 143      | 143 | 162     | 162 | 214     | 214 | 266     | 266 | 189      | 189 | 221      | 221 | 161     | 161 | 283       | 283 | 221       | 221 | 154     | 154 | 279       | 255 | 121       | 121 | 149      | 149 | 186     | 186 | 197      | 197 | 226      | 226 | 140     | 140 | 152     | 152 | 254     | 254 |
| P7S3    | 122        | 122 | 143      | 143 | 162     | 162 | 214     | 214 | 266     | 266 | 189      | 189 | 221      | 221 | 161     | 161 | 283       | 283 | 221       | 221 | 154     | 154 | 279       | 255 | 121       | 121 | 149      | 149 | 185     | 185 | 197      | 197 | 226      | 226 | 140     | 140 | 152     | 152 | 254     | 254 |
| P7S4    | 122        | 122 | 143      | 143 | 162     | 162 | 214     | 214 | 266     | 266 | 189      | 189 | 221      | 221 | 161     | 161 | 283       | 283 | 221       | 221 | 154     | 154 | 279       | 255 | 121       | 121 | 149      | 149 | 185     | 185 | 197      | 197 | 226      | 226 | 140     | 140 | 152     | 152 | 254     | 254 |
| Pram120 | 125        | 125 | 143      | 143 | 162     | 162 | 216     | 216 | 278     | 278 | 179      | 179 | 217      | 217 | 136     | 136 | 265       | 265 | 218       | 218 | 136     | 136 | 255       | 255 | 119       | 119 | 153      | 162 | 188     | 189 | 200      | 200 | 224      | 224 | 150     | 150 | 177     | 177 | 277     | 277 |
| Pram121 | 122        | 122 | 143      | 143 | 162     | 162 | 214     | 214 | 266     | 266 | 189      | 189 | 221      | 221 | 159     | 159 | 283       | 283 | 221       | 221 | 163     | 163 | 281       | 258 | 121       | 121 | 149      | 149 | 188     | 188 | 197      | 197 | 226      | 226 | 140     | 140 | 152     | 152 | 254     | 254 |

**Table S4 Dose-response EC50 and standard error summary per sample and for all the tested molecules**

| sample | 2PEITC   |          |          | racGR24  |          |          | +GR24    |          |          | -GR24    |          |          | +eGR24   |          |          | -eGR24   |          |          |
|--------|----------|----------|----------|----------|----------|----------|----------|----------|----------|----------|----------|----------|----------|----------|----------|----------|----------|----------|
|        | EC50     | SE       | p value  | EC50     | SE       | p value  | EC50     | SE       | p value  | EC50     | SE       | p value  | EC50     | SE       | p value  | EC50     | SE       | p value  |
| P1S1   | 3.43E-09 | 1.11E-09 | 6.12E-03 | 7.61E-12 | 2.49E-12 | 5.12E-03 | 7.15E-12 | 2.28E-12 | 5.95E-03 | 4.65E-09 | 1.26E-09 | 2.17E-03 | 5.24E-10 | 1.34E-10 | 1.38E-03 | 1.37E-12 | 4.21E-13 | 3.71E-03 |
| P1S2   | 3.07E-08 | 1.26E-08 | 2.46E-02 | 9.64E-12 | 2.85E-12 | 2.37E-03 | 1.54E-12 | 2.65E-13 | 1.35E-05 | 7.08E-10 | 1.50E-09 | 6.42E-01 | 3.49E-10 | 8.83E-11 | 1.15E-03 | 2.75E-12 | 1.03E-12 | 1.41E-02 |
| P1S3   | 2.97E-08 | 1.36E-08 | 3.78E-02 | 1.26E-11 | 3.64E-12 | 1.96E-03 | 2.66E-12 | 1.03E-12 | 1.76E-02 | 1.28E-09 | 6.86E-10 | 7.66E-02 | 1.57E-10 | 8.47E-10 | 8.55E-01 | 5.63E-12 | 1.88E-12 | 9.22E-03 |
| P1S4   | 2.59E-08 | 4.62E-09 | 3.23E-05 | 1.27E-11 | 4.26E-12 | 6.26E-03 | 3.17E-12 | 1.30E-12 | 2.43E-02 | 7.34E-10 | 1.24E-10 | 2.07E-05 | 9.43E-10 | 1.48E-09 | 5.32E-01 | 5.27E-12 | 1.24E-12 | 5.51E-04 |
| P2S1   | 3.95E-08 | 1.81E-08 | 3.86E-02 | 1.02E-11 | 2.53E-12 | 4.57E-04 | 1.40E-12 | 3.03E-13 | 2.16E-04 | 1.84E-10 | 3.71E-10 | 6.25E-01 | 9.48E-11 | 2.87E-10 | 7.44E-01 | 5.31E-13 | 1.61E-13 | 4.59E-03 |
| P2S2   | 3.28E-08 | 1.79E-09 | 1.12E-10 | 7.24E-12 | 2.47E-12 | 8.52E-03 | 6.56E-12 | 6.17E-12 | 3.03E-01 | 1.14E-09 | 4.73E-10 | 2.62E-02 | 7.71E-10 | 1.44E-09 | 5.98E-01 | 4.41E-12 | 1.99E-12 | 3.99E-02 |
| P2S3   | 1.67E-08 | 4.77E-09 | 1.71E-03 | 1.36E-11 | 6.42E-12 | 4.40E-02 | 2.64E-12 | 7.24E-14 | 6.69E-03 | 6.37E-10 | 7.55E-11 | 7.57E-08 | 2.31E-10 | 4.77E-11 | 8.67E-05 | 3.05E-12 | 1.01E-12 | 5.94E-03 |
| P2S4   | 1.14E-08 | 5.08E-09 | 3.71E-02 | 2.88E-11 | 9.00E-12 | 4.03E-03 | 8.76E-13 | 5.56E-13 | 1.29E-01 | 6.36E-10 | 7.78E-09 | 9.36E-01 | 2.49E-11 | 1.19E-10 | 8.36E-01 | 6.55E-13 | 2.89E-13 | 4.46E-02 |
| P3S1   | 5.67E-08 | 2.00E-08 | 1.10E-02 | 1.90E-09 | 8.95E-10 | 4.45E-02 | 1.86E-10 | 6.68E-11 | 1.33E-02 | 4.76E-09 | 1.52E-09 | 4.79E-03 | 9.05E-10 | 1.76E-10 | 4.22E-05 | 1.84E-12 | 6.06E-13 | 5.61E-03 |
| P3S2   | 1.36E-07 | 1.20E-07 | 2.94E-06 | 6.93E-10 | 1.09E-10 | 1.49E-06 | 2.75E-11 | 9.93E-12 | 1.42E-02 | 1.03E-09 | 2.08E-10 | 8.01E-05 | 1.05E-10 | 2.77E-11 | 1.63E-03 | 4.04E-13 | 3.99E-13 | 3.23E-01 |
| P3S3   | 6.76E-08 | 1.18E-08 | 6.99E-06 | 1.55E-09 | 5.02E-10 | 5.08E-03 | 8.15E-11 | 2.74E-11 | 7.74E-03 | 8.19E-10 | 1.03E-09 | 4.33E-01 | 1.07E-10 | 1.10E-10 | 3.41E-01 | 1.64E-12 | 6.77E-13 | 2.58E-02 |
| P3S4   | 4.18E-08 | 1.00E-08 | 3.64E-04 | 1.03E-09 | 8.62E-11 | 1.50E-11 | 1.14E-11 | 3.74E-12 | 1.12E-02 | 9.32E-10 | 2.39E-10 | 9.74E-04 | 1.35E-11 | 3.16E-11 | 6.75E-01 | 6.23E-13 | 1.15E-12 | 5.97E-01 |
| P3S5   | 4.73E-08 | 8.70E-09 | 2.99E-05 | 4.27E-10 | 2.00E-10 | 4.28E-02 | 5.84E-11 | 2.01E-11 | 9.74E-03 | 6.48E-10 | 3.21E-10 | 5.77E-02 | 3.31E-10 | 2.01E-10 | 1.18E-01 | 1.86E-13 | 1.95E-13 | 3.52E-01 |
| P4S1   | 8.90E-08 | 1.20E-08 | 5.02E-07 | 1.34E-09 | 3.53E-10 | 9.06E-04 | 9.42E-11 | 3.57E-11 | 1.95E-02 | 3.53E-10 | 1.41E-10 | 2.34E-02 | 1.09E-09 | 3.84E-10 | 1.08E-02 | 1.03E-12 | 2.03E-13 | 8.16E-05 |
| P4S2   | 6.15E-07 | 2.67E-07 | 3.04E-02 | 8.79E-10 | 2.86E-10 | 5.16E-03 | 1.47E-10 | 3.16E-11 | 6.92E-04 | 1.14E-09 | 1.72E-09 | 5.14E-01 | 1.47E-09 | 1.40E-09 | 3.06E-01 | 1.82E-12 | 4.30E-13 | 9.70E-04 |
| P4S3   | 2.50E-07 | 6.32E-08 | 7.23E-04 | 5.15E-10 | 1.10E-10 | 1.04E-04 | 4.57E-11 | 5.45E-12 | 2.99E-07 | 4.04E-10 | 1.22E-10 | 3.25E-03 | 4.60E-10 | 7.96E-11 | 1.80E-05 | 7.04E-13 | 2.80E-13 | 2.21E-02 |
| P4S4   | 2.54E-07 | 3.80E-08 | 4.32E-07 | 6.91E-10 | 1.28E-10 | 1.51E-05 | 4.39E-10 | 1.48E-10 | 8.73E-03 | 9.21E-10 | 1.56E-10 | 7.31E-06 | 4.20E-09 | 1.45E-09 | 8.60E-03 | 2.67E-12 | 4.06E-13 | 2.68E-06 |
| P5S1   | 2.92E-09 | 1.30E-08 | 2.94E-06 | 2.29E-10 | 1.10E-10 | 4.93E-02 | 8.81E-11 | 2.69E-11 | 4.76E-03 | 1.72E-09 | 3.72E-10 | 1.20E-04 | 3.38E-10 | 8.54E-11 | 6.78E-04 | 4.03E-13 | 3.09E-13 | 2.06E-01 |
| P5S2   | 2.92E-09 | 1.32E-09 | 3.72E-02 | 1.84E-10 | 7.30E-11 | 1.90E-02 | 5.48E-11 | 2.24E-11 | 2.40E-02 | 1.22E-09 | 4.72E-10 | 1.73E-02 | 3.88E-10 | 7.41E-11 | 4.64E-05 | 5.61E-13 | 7.12E-13 | 4.46E-01 |
| P6S1   | 6.97E-08 | 1.79E-08 | 6.07E-04 | 9.02E-09 | 3.59E-09 | 1.99E-02 | 2.53E-10 | 5.00E-11 | 6.85E-05 | 5.01E-08 | 8.05E-09 | 2.39E-06 | 3.91E-08 | 5.83E-09 | 6.22E-07 | 4.11E-10 | 7.40E-11 | 1.19E-05 |
| P6S2   | 1.83E-08 | 1.46E-09 | 1.23E-10 | 2.18E-09 | 5.46E-10 | 6.19E-04 | 2.17E-10 | 6.97E-11 | 7.66E-03 | 5.24E-08 | 5.22E-09 | 4.69E-10 | 5.49E-08 | 1.71E-08 | 3.67E-03 | 4.16E-10 | 1.16E-10 | 1.47E-03 |
| P6S3   | 6.11E-08 | 2.46E-08 | 2.05E-02 | 2.54E-09 | 6.28E-10 | 5.93E-04 | 9.65E-11 | 2.74E-11 | 2.28E-03 | 8.15E-08 | 4.01E-08 | 5.39E-02 | 1.38E-08 | 1.87E-08 | 4.69E-01 | 1.88E-10 | 5.67E-11 | 2.98E-03 |
| P7S1   | 4.59E-07 | 9.19E-08 | 3.79E-05 | 1.27E-09 | 4.12E-10 | 5.58E-03 | 1.17E-09 | 3.93E-10 | 1.06E-02 | 9.28E-08 | 4.80E-09 | 2.71E-15 | 2.69E-09 | 2.14E-08 | 9.01E-01 | 3.44E-11 | 2.31E-10 | 8.84E-01 |
| P7S2   | 3.91E-07 | 8.39E-08 | 1.72E-04 | 4.11E-10 | 1.80E-10 | 3.15E-02 | 7.21E-10 | 2.65E-10 | 1.51E-02 | 6.99E-07 | 4.83E-07 | 1.61E-01 | 1.57E-07 | 2.20E-08 | 4.55E-07 | 9.87E-10 | 2.41E-10 | 4.80E-04 |
| P7S3   | 2.71E-07 | 3.50E-08 | 4.18E-08 | 7.53E-10 | 2.36E-10 | 3.89E-03 | 3.81E-10 | 1.66E-10 | 3.69E-02 | 7.11E-08 | 1.41E-07 | 6.19E-01 | 2.99E-08 | 2.17E-08 | 1.91E-01 | 1.04E-09 | 2.50E-10 | 4.78E-04 |
| P7S4   | 1.91E-07 | 4.79E-08 | 5.42E-04 | 1.17E-10 | 3.97E-11 | 7.91E-03 | 9.48E-11 | 3.11E-11 | 6.69E-03 | 5.57E-08 | 7.86E-09 | 7.15E-07 | 9.11E-09 | 1.62E-09 | 1.68E-05 | 1.02E-09 | 1.17E-10 | 6.66E-08 |

**Table S5 Prevalence and abundance of *P. ramosa* seed core microbial ASVs in soil samples**

| Marker gene | ASV identifier and taxonomic identification on SILVA <sup>a</sup> and UNITE <sup>b</sup> databases | Relative prevalence <sup>c</sup> (% of the total prevalence) | Relative abundance <sup>d</sup> (% of the total abundance) | Raw abundance (average number of reads) | Raw abundance in seeds (average number of reads) | Ratio seed/soil |
|-------------|----------------------------------------------------------------------------------------------------|--------------------------------------------------------------|------------------------------------------------------------|-----------------------------------------|--------------------------------------------------|-----------------|
| 16S         | ASV1578_Sphingomonas_unidentified                                                                  | 36.36                                                        | 0.11                                                       | 13.18                                   | 132.63                                           | 10.06           |
|             | ASV1971_Rhizobium_unidentified                                                                     | 7.58                                                         | 0.04                                                       | 4.67                                    | 166.85                                           | 35.75           |
|             | ASV1998_unidentified                                                                               | 15.15                                                        | 0.04                                                       | 5.11                                    | 45.90                                            | 8.99            |
|             | ASV2261_Stenotrophomonas_rhizophila                                                                | 33.33                                                        | 0.16                                                       | 19.17                                   | 281.46                                           | 14.68           |
|             | ASV2265_Stenotrophomonas_unidentified                                                              | 31.81                                                        | 0.52                                                       | 60.74                                   | 283.46                                           | 4.67            |
|             | ASV2268_Stenotrophomonas_chelatiphaga                                                              | 13.64                                                        | 0.06                                                       | 6.50                                    | 105.50                                           | 16.23           |
|             | ASV2876_Paenibacillus_unidentified                                                                 | 6.06                                                         | 0.01                                                       | 1.05                                    | 102.33                                           | 97.88           |
|             | ASV2956_Pseudomonas_unidentified                                                                   | 9.10                                                         | 0.04                                                       | 5.21                                    | 169.51                                           | 32.52           |
|             | ASV2990_Pseudomonas_unidentified                                                                   | 45.45                                                        | 0.25                                                       | 29.03                                   | 384.00                                           | 13.23           |
|             | ASV710_Pedobacter_unidentified                                                                     | 22.73                                                        | 0.08                                                       | 9.05                                    | 159.83                                           | 17.67           |
| ITS         | ASV140_Vishniacozyma_victoriae                                                                     | 89.39                                                        | 1.43                                                       | 99.18                                   | 166.97                                           | 1.68            |
|             | ASV1817_unidentified                                                                               | 93.94                                                        | 2.42                                                       | 167.58                                  | 245.27                                           | 1.46            |
|             | ASV1920_Plectosphaerella_cucumerina                                                                | 96.97                                                        | 7.51                                                       | 519.36                                  | 1203.00                                          | 2.32            |
|             | ASV2459_unidentified                                                                               | 90.91                                                        | 0.96                                                       | 66.74                                   | 467.49                                           | 7.00            |
|             | ASV2467_Fusarium_unidentified                                                                      | 100                                                          | 8.95                                                       | 618.55                                  | 210.63                                           | 0.34            |
|             | ASV2639_Mycosphaerella_tassiana                                                                    | 93.94                                                        | 0.84                                                       | 58.11                                   | 240.86                                           | 4.15            |
|             | ASV2644_Cladosporium_unidentified                                                                  | 98.48                                                        | 6.29                                                       | 434.64                                  | 2960.45                                          | 6.81            |

<sup>a</sup> SILVA, database of bacterial species (<https://www.arb-silva.de/>)

<sup>b</sup> UNITE, database of fungal species (<https://unite.ut.ee/>)

<sup>c</sup> Relative prevalence represents the number of sample in which each seed core ASV is detected expressed as percentage to the total number of sample triplicates

<sup>d</sup> Relative abundance represents the abundance sum of each seed core ASV expressed as percentage to the total abundance in all samples



**Table S6 Prevalence and abundance of host related – *P. ramosa* seed core microbial ASVs in soil samples**

| Marker gene | Host         | ASV identifier and taxonomic identification on SILVA <sup>a</sup> and UNITE <sup>b</sup> databases | Relative prevalence <sup>c</sup> (% of the total prevalence) | Relative abundance <sup>d</sup> (% of the total abundance) | Raw abundance in soil (average number of reads) | Raw abundance in seeds (average number of reads) | Ratio seed/soil |
|-------------|--------------|----------------------------------------------------------------------------------------------------|--------------------------------------------------------------|------------------------------------------------------------|-------------------------------------------------|--------------------------------------------------|-----------------|
| <b>16S</b>  | Tobacco      | ASV2965_Pseudomonas_unidentified                                                                   | 1.51                                                         | < 0.01                                                     | 0,32                                            | 167,33                                           | 525,90          |
|             | Oilseed rape | ASV3317_Nannocystis_unidentified                                                                   | 1.51                                                         | < 0.01                                                     | 0,39                                            | 32,32                                            | 144,97          |
|             | Tobacco      | ASV638_Sphingobacterium_sp. 23D10-4-9                                                              | 6.06                                                         | 0.01                                                       | 1,24                                            | 22,58                                            | 18,17           |
|             | Oilseed rape | ASV668_Sphingobacterium_sp. MIMdw12                                                                | Not detected                                                 | Not detected                                               | 0,00                                            | 17,79                                            | Not calculated  |
|             | Hemp         | ASV718_Pedobacter_unidentified                                                                     | 1.51                                                         | < 0.01                                                     | 0,47                                            | 18,86                                            | 40,15           |
| <b>ITS</b>  | Oilseed rape | ASV1153_unidentified_unidentified                                                                  | 27.27                                                        | 0.14                                                       | 9,82                                            | 3,81                                             | 0,39            |
|             |              | ASV1708_Leptosphaeria_maculans                                                                     | 16.67                                                        | 0.58                                                       | 40,02                                           | 2,78                                             | 0,07            |

<sup>a</sup> SILVA, database of bacterial species (<https://www.arb-silva.de/>)

<sup>b</sup> UNITE, database of fungal species (<https://unite.ut.ee/>)

<sup>c</sup> Relative prevalence represents the number of soil sample in which each seed core ASV is detected expressed as percentage to the total number of soil samples

<sup>d</sup> Relative prevalence represents the number of soil sample in which each seed core ASV is detected expressed as percentage to the total number of soil sample triplicates
